# Supplementary material for: High-affinity anti-Arc nanobodies provide tools for structural and functional studies
Source: PubMed Central journal article supplement (PMC9173642; doi:10.1371/journal.pone.0269281), 2022-06-07
Supplement: pone.0269281.s001.pdf [file pone.0269281.s001.pdf]

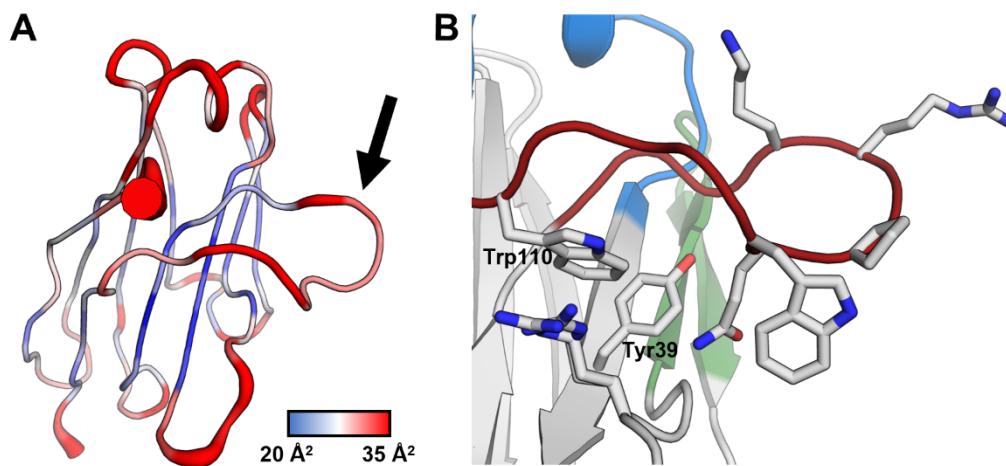

**S1 Figure. Flexibility of the CDR loops of NbArc-E5.** **A** The crystallographic B-factors of the NbArc-E5 crystal structure demonstrate the rigidity of the CDR3 loop (highlighted by arrow). **B** Rigidity of the CDR3 loop is likely accounted for by packing of its large hydrophobic side chains onto the exterior of the  $\beta$ -barrel fold. This could also account for the increased solubility of NbArc-E5 when compared to the other Nbs.
