# Supplementary material for: High-affinity anti-Arc nanobodies provide tools for structural and functional studies
Source: PubMed Central journal article supplement (PMC9173642; doi:10.1371/journal.pone.0269281), 2022-06-07
Supplement: pone.0269281.s002.pdf [file pone.0269281.s002.pdf]

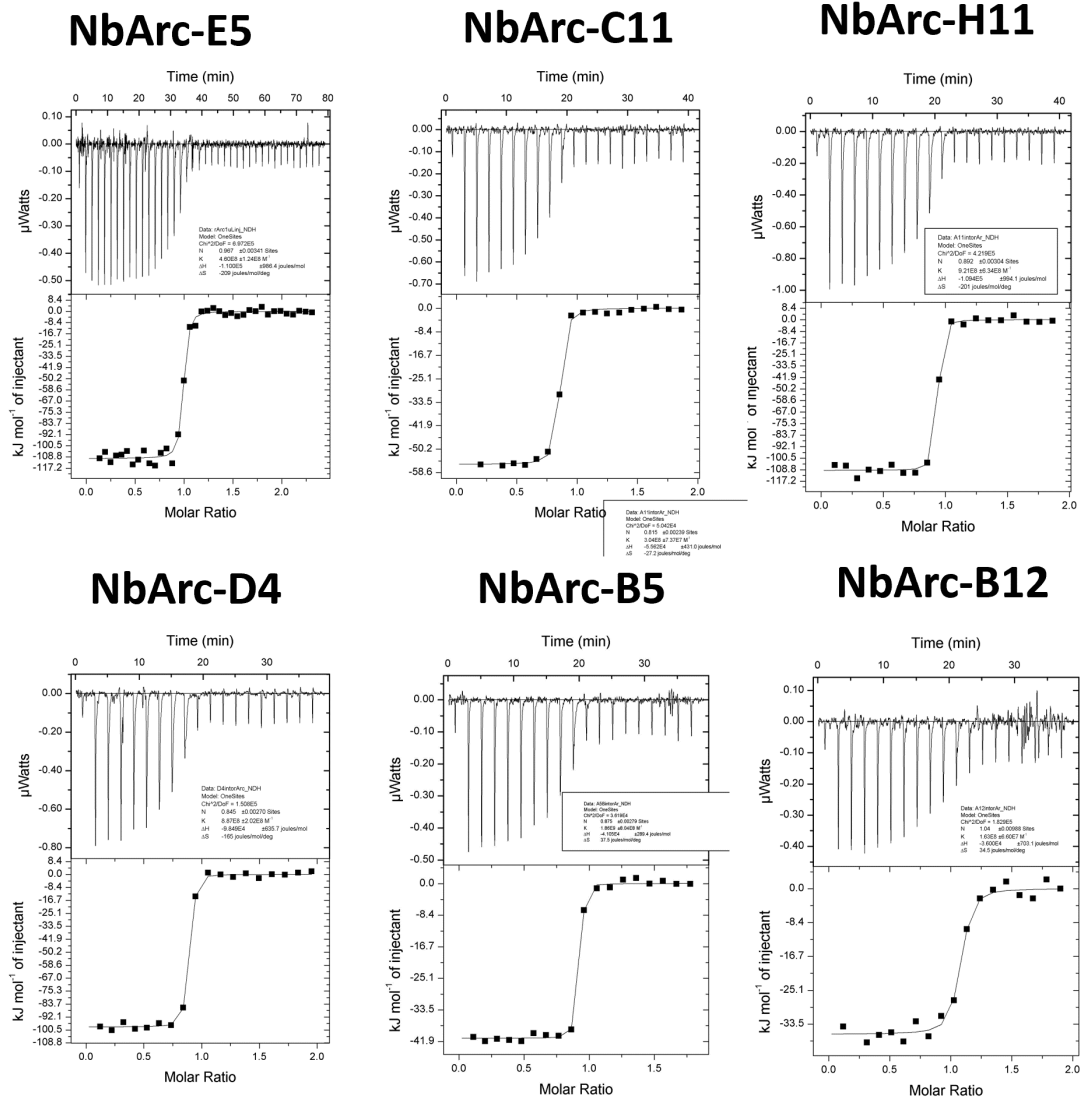

**S2 Figure. NbArc ITC titrations into FLrArc-7A, raw and integrated thermograms.**
