# Supplementary material for: High-affinity anti-Arc nanobodies provide tools for structural and functional studies
Source: PubMed Central journal article supplement (PMC9173642; doi:10.1371/journal.pone.0269281), 2022-06-07
Supplement: pone.0269281.s003.pdf [file pone.0269281.s003.pdf]

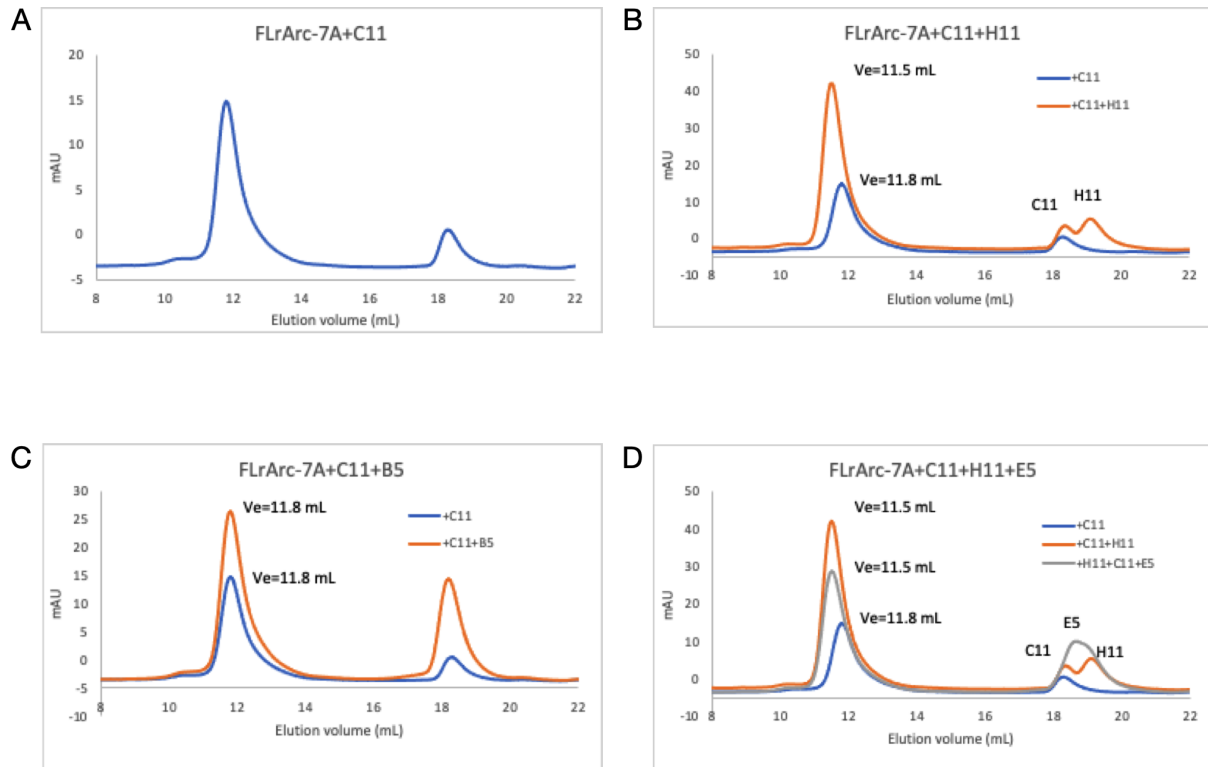

**S3 Figure. Competition assay of FLrArc-7A with selected nanobodies using analytical SEC. A** The complex with C11 elutes at ~12 ml and the excess Nb at ~18 ml. **B** Position of the complex peak reveals that both C11 and H11 bind at the same time. **C** C11 and B5 compete for binding, as no shift of the complex peak is observed. **D** H11 and E5 compete for binding.
