# Supplementary material for: High-affinity anti-Arc nanobodies provide tools for structural and functional studies
Source: PubMed Central journal article supplement (PMC9173642; doi:10.1371/journal.pone.0269281), 2022-06-07
Supplement: pone.0269281.s004.pdf [file pone.0269281.s004.pdf]

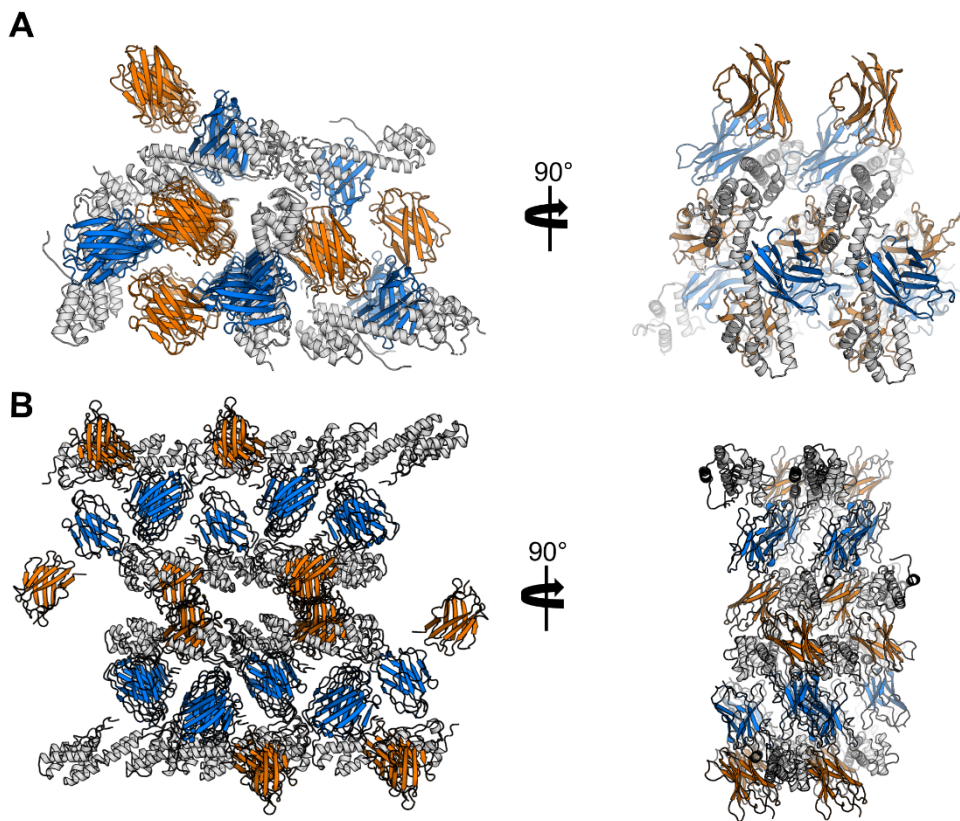

**S4 Figure. Crystal contacts.** In both the rArc-CTD (**A**) and the hArc-CTD extended crystal structure (**B**), contacts were formed almost exclusively by the bound Nbs. The CTD is coloured grey, H11 orange and C11 blue.
