# Supplementary material for: High-affinity anti-Arc nanobodies provide tools for structural and functional studies
Source: PubMed Central journal article supplement (PMC9173642; doi:10.1371/journal.pone.0269281), 2022-06-07
Supplement: pone.0269281.s006.pdf [file pone.0269281.s006.pdf]

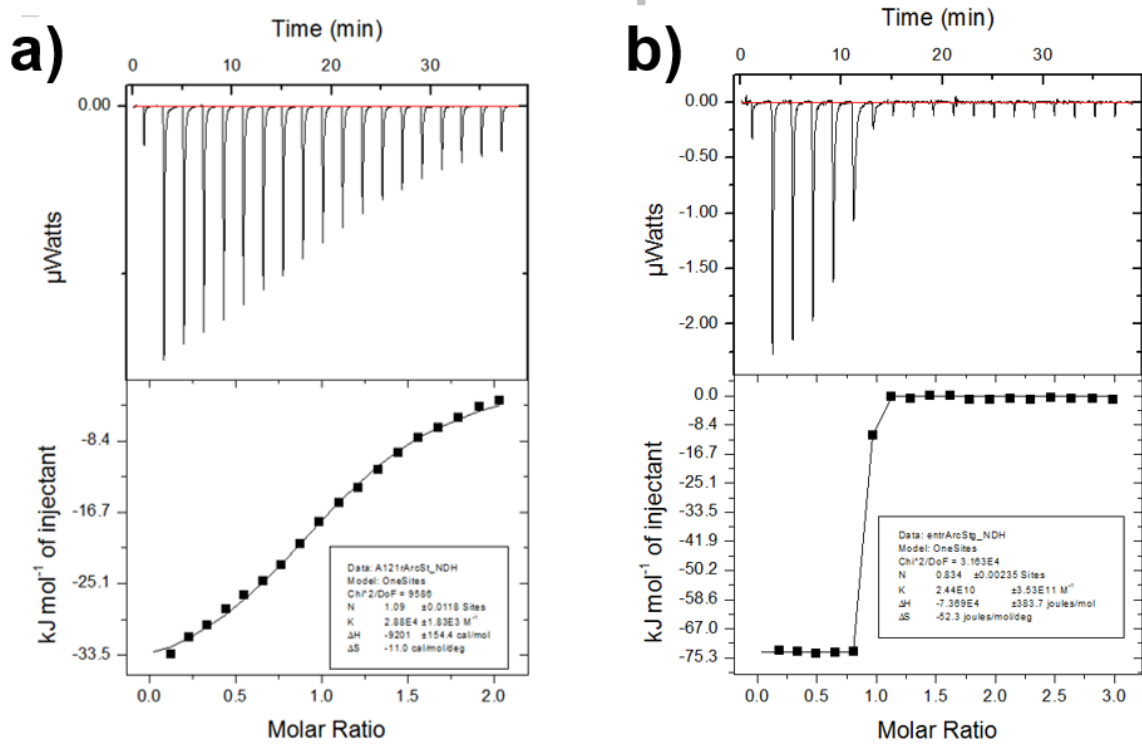

**S6 Figure. Raw ITC thermograms. A** Titration of the Stg peptide into FLrArc-7A. **B** titration of NbArc-H11 into Stg-bound FLrArc-7A.
