# Supplementary material for: High-affinity anti-Arc nanobodies provide tools for structural and functional studies
Source: PubMed Central journal article supplement (PMC9173642; doi:10.1371/journal.pone.0269281), 2022-06-07
Supplement: pone.0269281.s009.pdf [file pone.0269281.s009.pdf]

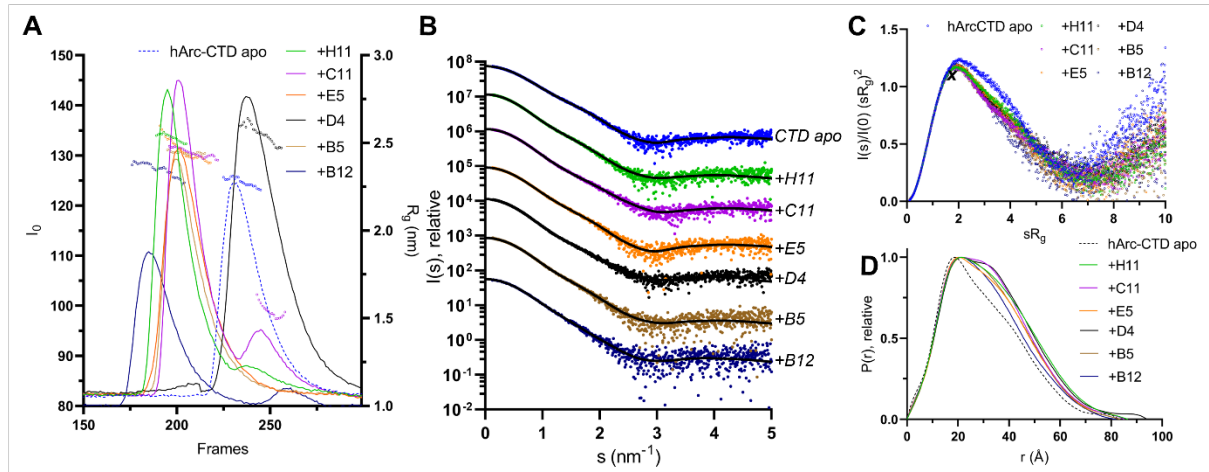

**S9 Figure. SEC-SAXS of hArc-CTD Nb complexes.** **A** SEC-SAXS elution profiles. The observed scattering intensity is shown as lines (left Y-axis) and the calculated  $R_g$  is shown for the frames used for data processing.  $R_g$  of the Nb excess peaks is shown for C11 and H11+C11 complex run, although they were not used for processing. **B** Scattering curves obtained from the main SEC peaks. Curves are offset for clarity, and data fits from GNOM shown as solid lines. **C** Dimensionless Kratky plot. The maximum for an ideal rigid spherical particle is marked with X ( $\sqrt{3}$ , 1.104). **D** Distance distribution profiles. The free hArc-CTD (apo) profile is shown as black dashes.
