# Supplementary material for: High-affinity anti-Arc nanobodies provide tools for structural and functional studies
Source: PubMed Central journal article supplement (PMC9173642; doi:10.1371/journal.pone.0269281), 2022-06-07
Supplement: pone.0269281.s010.pdf [file pone.0269281.s010.pdf]

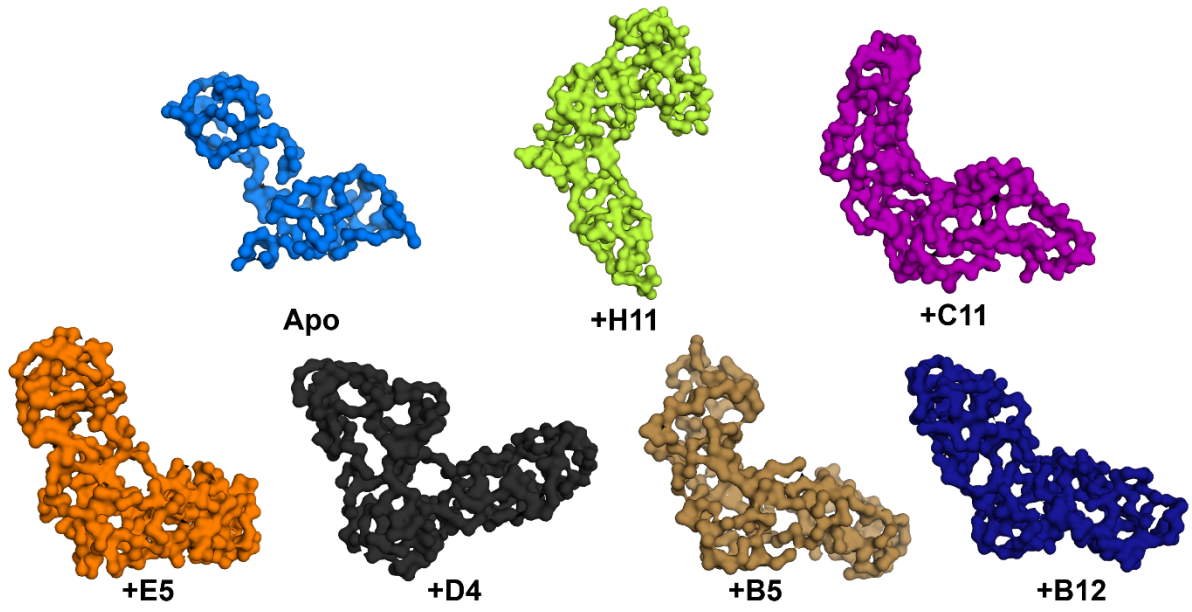

**S10 Figure.** *Ab initio* models of the hArc-CTD in apo state and in complex with the anti-Arc Nbs derived from the SAXS data.
