# Supplementary material for: High-affinity anti-Arc nanobodies provide tools for structural and functional studies
Source: PubMed Central journal article supplement (PMC9173642; doi:10.1371/journal.pone.0269281), 2022-06-07
Supplement: pone.0269281.s013.pdf [file pone.0269281.s013.pdf]

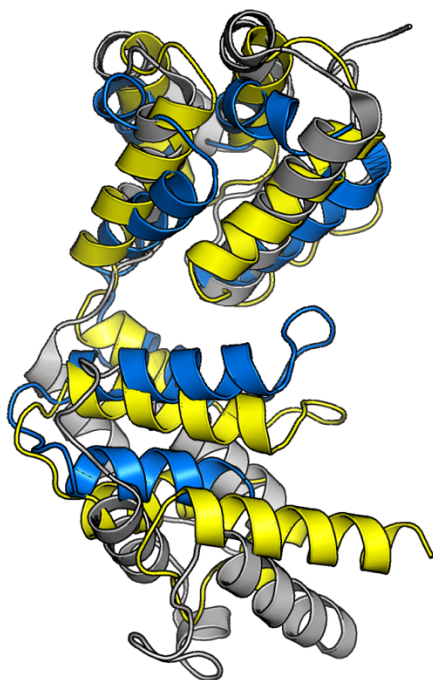

**S13 Figure. Superposition of collapsed conformations.** The collapsed hArc CTD crystal structure (blue), dArc2 monomer from a capsid (gray), and AlphaFold2 prediction of the collapsed form (yellow).
