# Supplementary material for: High-affinity anti-Arc nanobodies provide tools for structural and functional studies
Source: PubMed Central journal article supplement (PMC9173642; doi:10.1371/journal.pone.0269281), 2022-06-07
Supplement: pone.0269281.s014.pdf [file pone.0269281.s014.pdf]

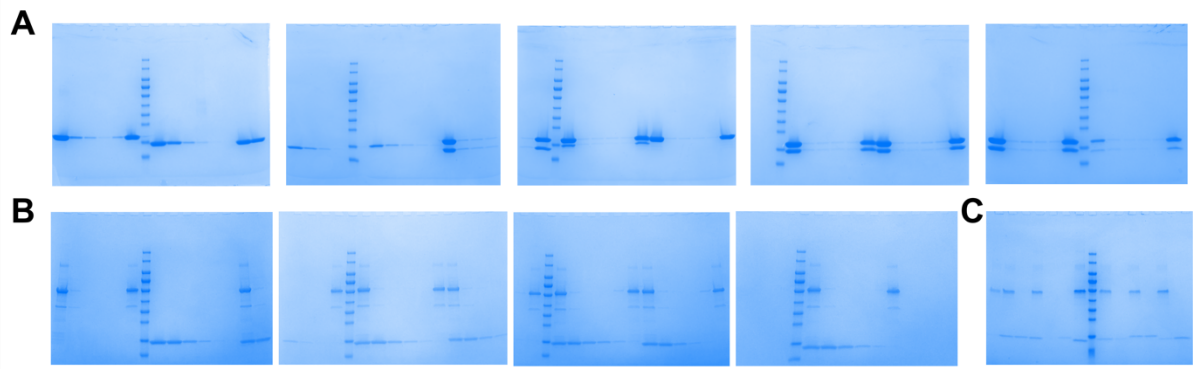

**S14 Figure. Unedited gel figures.** Unedited SDS-PAGE gel images of (A) hArc-CTD Nb pulldowns, (B) MBP-2rNT Nb pulldowns and (C) hArc capsid Nb co-elutions.
