# Supplementary material for: High-affinity anti-Arc nanobodies provide tools for structural and functional studies
Source: PubMed Central journal article supplement (PMC9173642; doi:10.1371/journal.pone.0269281), 2022-06-07
Supplement: pone.0269281.s015.pdf [file pone.0269281.s015.pdf]

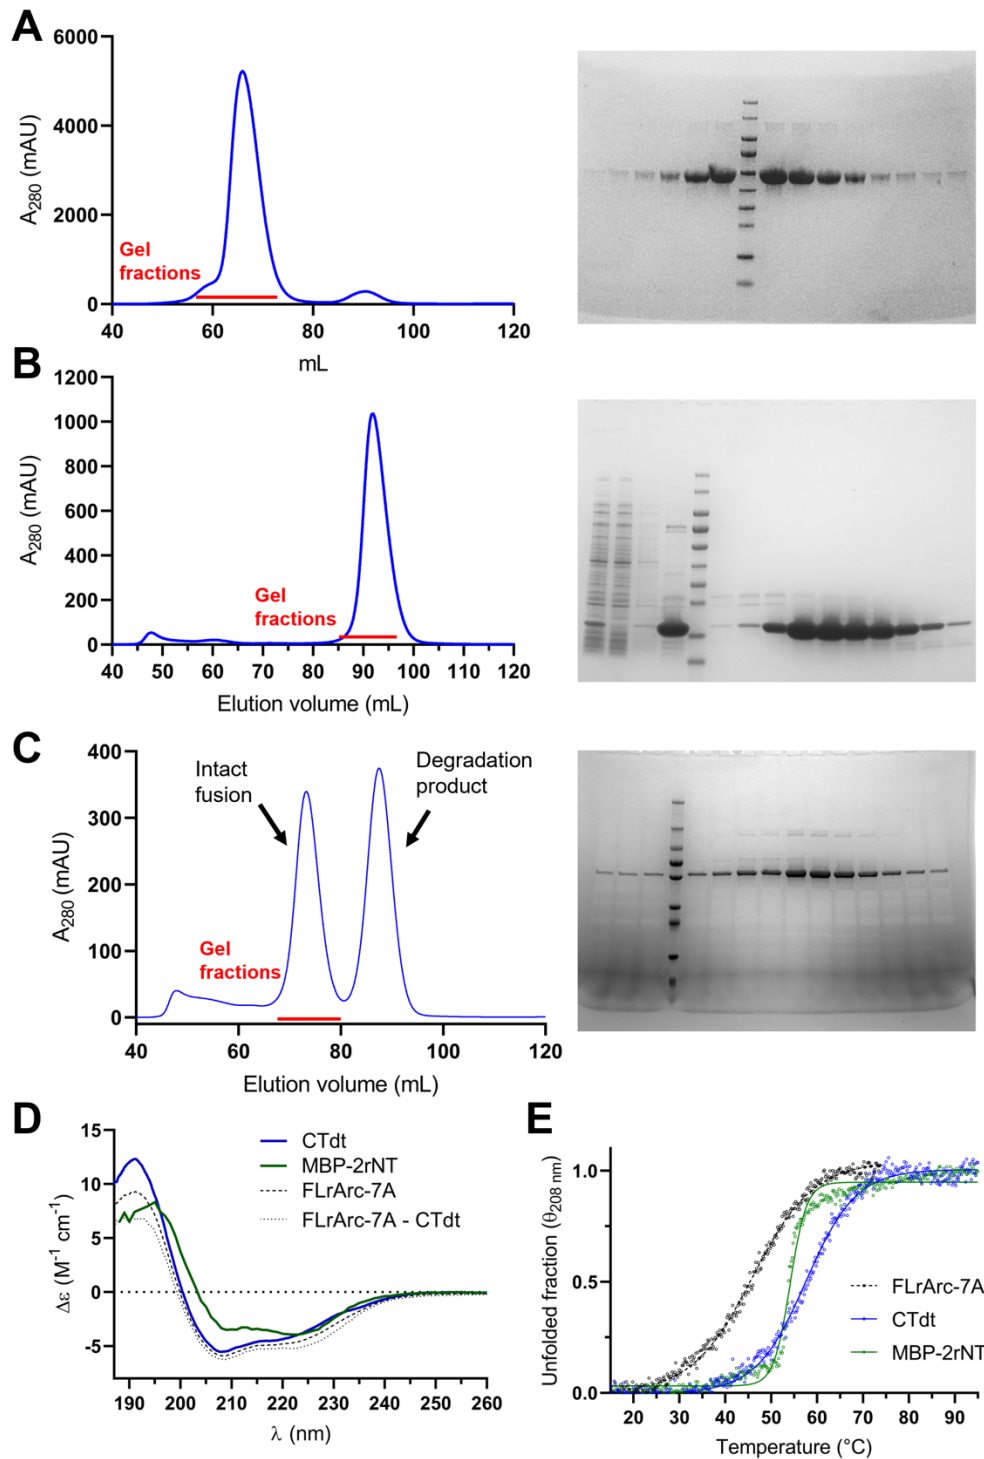

**S15 Figure. Purifications and CD.** Purification and initial characterisation of the Arc constructs. Purifications of FLaArc-7A, hArc-CTD and the MBP-2rNT fusion are shown in panels **A**, **B** and **C**, respectively. The last SEC purification steps are shown on the left (absorption normalised to 1 cm only for FLaArc-7A), and SDS-PAGE analysis of SEC fractions on the right. **D** CD spectra of the three constructs suggested them all to be mainly  $\alpha$ -helical. **E** CD temperature denaturation experiments suggested all three constructs to be well folded, as all gave good denaturation curves. The  $T_m$  values derived from the transitions were  $46.0^{\circ}C$ ,  $57.6^{\circ}C$  and  $54.1^{\circ}C$  for FLaArc-7A, hArc-CTD and MBP-2rNT, respectively.
