# Supplementary material for: High-affinity anti-Arc nanobodies provide tools for structural and functional studies
Source: PubMed Central journal article supplement (PMC9173642; doi:10.1371/journal.pone.0269281), 2022-06-07
Supplement: pone.0269281.s016.pdf [file pone.0269281.s016.pdf]

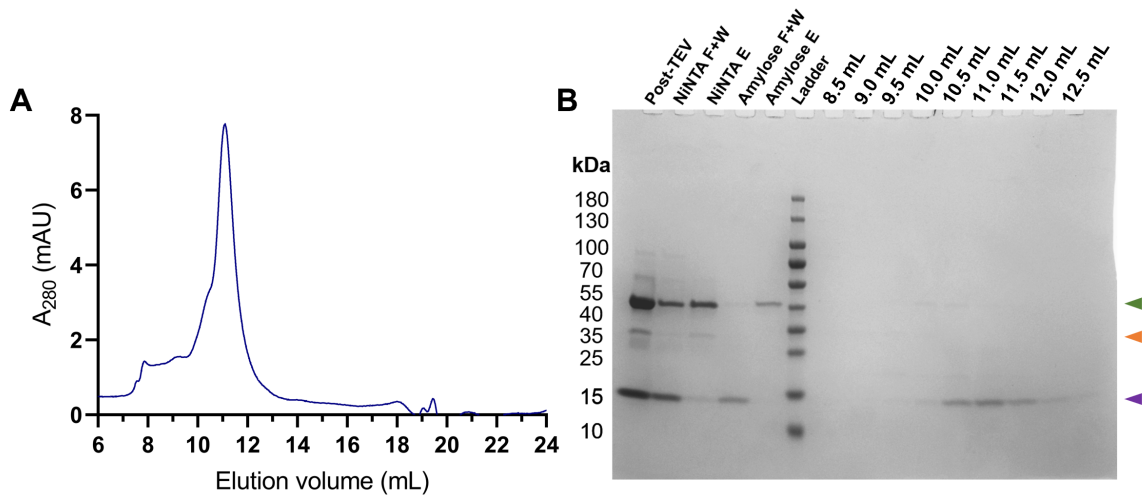

**S16 Figure. Small-scale purification of Arc-NTD after cleavage of MBP tag.** A. SEC after removal of MBP tag. B. SDS-PAGE of purification and SEC fractions. Indicated are the fusion protein (green arrowhead), MBP (orange), and free Arc-NTD (magenta).
